# Supplementary material
Source: publisher figshare collection journal article supplement (https://tandf.figshare.com/articles/dataset/_/3189004)
Supplement: Supplementary file 1 [file 1]

## A Supplementary File

**Table A.** Rejection rates of the L-test under the null hypotheses  $H_{03} : \beta_3(u, v) = \beta_3$  and  $H_{04} : \beta_4(u, v) = \beta_4$  with sample size  $n = 441$ .

| $\alpha$ | Collinearity            | Error distribution |          |                              |          |                            |          |
|----------|-------------------------|--------------------|----------|------------------------------|----------|----------------------------|----------|
|          |                         | $N(0, 1)$          |          | $U(-\sqrt{(3)}, \sqrt{(3)})$ |          | $\frac{1}{2}\chi^2(2) - 1$ |          |
|          |                         | $H_{03}$           | $H_{04}$ | $H_{03}$                     | $H_{04}$ | $H_{03}$                   | $H_{04}$ |
| 0.01     | Independent             | 0.024              | 0.036    | 0.012                        | 0.028    | 0.020                      | 0.038    |
|          | $\rho_{X_1, X_2} = 0.5$ | 0.038              | 0.058    | 0.024                        | 0.038    | 0.032                      | 0.062    |
|          | $\rho_{X_1, X_2} = 0.8$ | 0.060              | 0.082    | 0.030                        | 0.056    | 0.052                      | 0.090    |
|          | $\rho_{X_2, X_3} = 0.5$ | 0.026              | 0.042    | 0.018                        | 0.030    | 0.022                      | 0.054    |
|          | $\rho_{X_2, X_3} = 0.8$ | 0.024              | 0.050    | 0.020                        | 0.034    | 0.012                      | 0.066    |
|          | $\rho_{X_3, X_4} = 0.5$ | 0.020              | 0.034    | 0.012                        | 0.024    | 0.024                      | 0.038    |
|          | $\rho_{X_3, X_4} = 0.8$ | 0.024              | 0.026    | 0.018                        | 0.024    | 0.032                      | 0.042    |
| 0.05     | Independent             | 0.080              | 0.118    | 0.062                        | 0.098    | 0.080                      | 0.130    |
|          | $\rho_{X_1, X_2} = 0.5$ | 0.120              | 0.150    | 0.010                        | 0.146    | 0.118                      | 0.176    |
|          | $\rho_{X_1, X_2} = 0.8$ | 0.164              | 0.210    | 0.156                        | 0.190    | 0.172                      | 0.220    |
|          | $\rho_{X_2, X_3} = 0.5$ | 0.094              | 0.140    | 0.070                        | 0.114    | 0.084                      | 0.158    |
|          | $\rho_{X_2, X_3} = 0.8$ | 0.090              | 0.148    | 0.068                        | 0.140    | 0.076                      | 0.174    |
|          | $\rho_{X_3, X_4} = 0.5$ | 0.092              | 0.120    | 0.070                        | 0.108    | 0.098                      | 0.142    |
|          | $\rho_{X_3, X_4} = 0.8$ | 0.102              | 0.108    | 0.084                        | 0.112    | 0.108                      | 0.140    |
| 0.10     | Independent             | 0.136              | 0.184    | 0.142                        | 0.200    | 0.138                      | 0.214    |
|          | $\rho_{X_1, X_2} = 0.5$ | 0.198              | 0.264    | 0.190                        | 0.270    | 0.192                      | 0.278    |
|          | $\rho_{X_1, X_2} = 0.8$ | 0.272              | 0.358    | 0.260                        | 0.342    | 0.278                      | 0.360    |
|          | $\rho_{X_2, X_3} = 0.5$ | 0.154              | 0.218    | 0.126                        | 0.228    | 0.148                      | 0.234    |
|          | $\rho_{X_2, X_3} = 0.8$ | 0.162              | 0.254    | 0.118                        | 0.258    | 0.150                      | 0.274    |
|          | $\rho_{X_3, X_4} = 0.5$ | 0.178              | 0.196    | 0.150                        | 0.198    | 0.150                      | 0.236    |
|          | $\rho_{X_3, X_4} = 0.8$ | 0.198              | 0.220    | 0.156                        | 0.198    | 0.172                      | 0.206    |

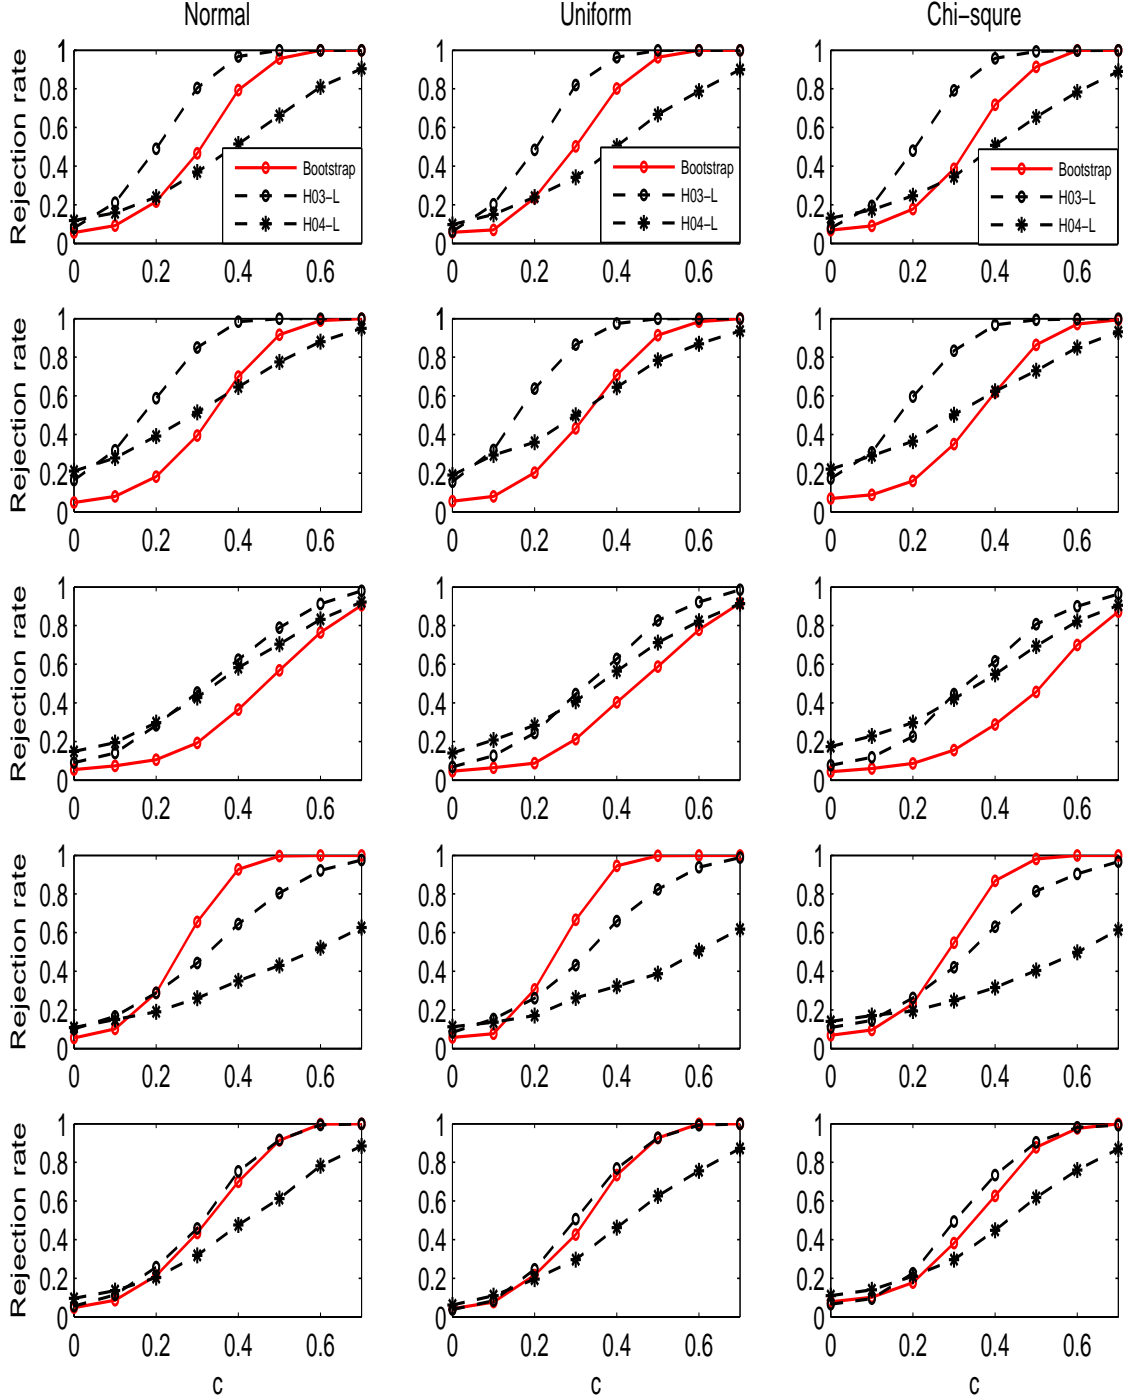

**Figure A.** Power functions of the bootstrap test for the null hypothesis  $H_0 : \beta_3(u, v) = \beta_3$  and  $\beta_4(u, v) = \beta_4$  and the L-test for the null hypotheses  $H_{03} : \beta_3(u, v) = \beta_3$  (“H03-L” in the legend) and  $H_{04} : \beta_4(u, v) = \beta_4$  (“H04-L” in the legend) with the significance level  $\alpha = 0.05$  and the sample size  $n = 441$ . The first to the fifth rows are respectively for (i) mutually independent variables; (ii)  $\rho_{X_1, X_2} = 0.8$ ; (iii)  $\rho_{X_2, X_3} = 0.8$ ; (iv)  $\rho_{X_3, X_4} = 0.8$ ; and (v)  $\rho_{X_2, X_3} = -0.8$ .
